# Supplementary material for: A Diet Rich in HUFAs Enhances the Energetic and Immune Response Capacities of Larvae of the Scallop Argopecten purpuratus
Source: MDPI journal article supplement (doi:10.3390/ani13081416), 2023-04-20
Supplement: s1 [file s1]

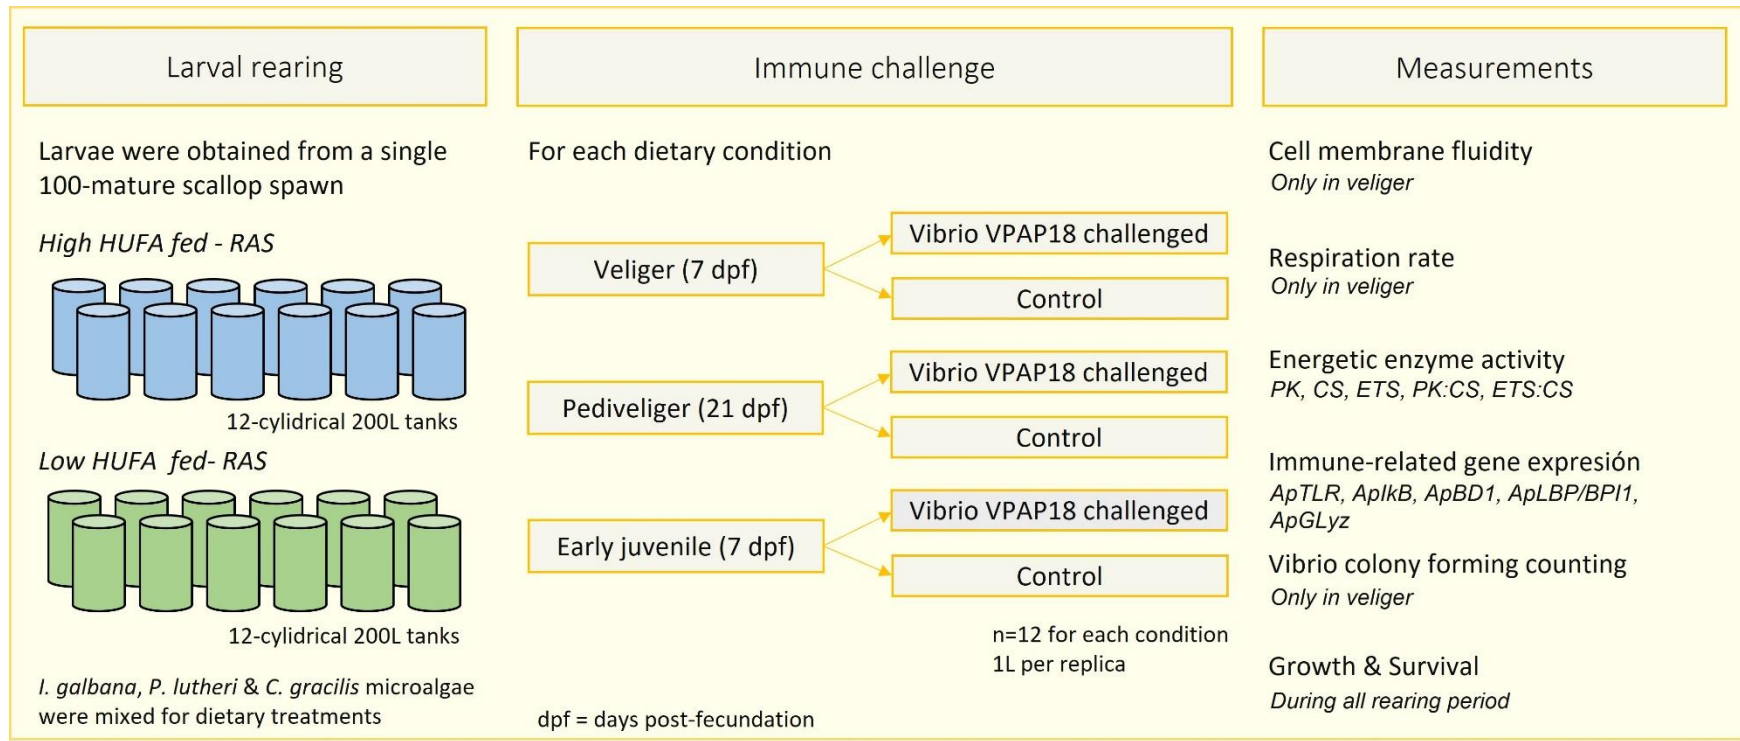

**Supplementary Figure S1.** Experimental design applied to larvae and early juveniles of the scallop *Argopecten purpuratus*. Larvae and juveniles were grown with diets based on microalgae high and low in HUFAs and then exposed to the pathogenic *Vibrio splendidus* strain VPAP18 for 24 h at the veliger (8 dpf), pediveliger (21 dpf) and early juvenile (40 dpf) stages.

**Supplementary Table S1.** Proximal composition and fatty acid profile of microalgal species used in scallop diets cultivated with or without nutritional stress (WNM and NNM, respectively). Lowercase letters indicate significant differences ( $P < 0.05$ ) between every microalga species.

| Microalgae specie                                        | <i>I. galbana</i> clon T-iso |                              | <i>P. lutheri</i>          |                               | <i>C. gracilis</i>          |                             |
|----------------------------------------------------------|------------------------------|------------------------------|----------------------------|-------------------------------|-----------------------------|-----------------------------|
| Culture method                                           | NNM                          | WNM                          | NNM                        | WNM                           | NNM                         | WNM                         |
| <b>Proteins</b><br>(ug. mg wet mass <sup>-1</sup> )      | 1111.56 (75.34) <sup>b</sup> | 1566.9 (107.55) <sup>a</sup> | 990.9 (38.51) <sup>b</sup> | 1559.56 (136.16) <sup>a</sup> | NC                          | NC                          |
| <b>Carbohydrates</b><br>(ug. mg wet mass <sup>-1</sup> ) | 90.86 (4.36) <sup>a</sup>    | 49.17 (9.64) <sup>b</sup>    | 22.95 (4.14) <sup>b</sup>  | 66.33 (7.48) <sup>a</sup>     | NC                          | NC                          |
| <b>Lipids (% dry mass)</b>                               | 20.03                        | 24.35                        | 23.87                      | 29.15                         | 3.92                        | 4.11                        |
| <b>FAME (mg)</b>                                         | 11.2                         | 36.9                         | 10.89                      | 16.9                          | 2.49                        | 4.1                         |
| $\Sigma$ Saturated fatty acid                            | 4.93 (0.21) <sup>b</sup>     | 17.41 (0.33) <sup>a</sup>    | 5.11 (0.08) <sup>b</sup>   | 7.79 (0.08) <sup>a</sup>      | 1.28 (0.006) <sup>b</sup>   | 2.03 (0.01) <sup>a</sup>    |
| $\Sigma$ Monounsaturated fatty acid                      | 2.16 (0.22) <sup>b</sup>     | 9.73 (0.20) <sup>a</sup>     | 2.3 (0.003) <sup>b</sup>   | 4.81 (0.03) <sup>a</sup>      | 0.93 (0.001) <sup>b</sup>   | 1.48 (0.004) <sup>a</sup>   |
| $\Sigma$ Polyunsaturated fatty acid                      | 3.8 (0.12) <sup>b</sup>      | 9.9 (0.12) <sup>a</sup>      | 3.5 (0.08) <sup>b</sup>    | 4.4 (0.04) <sup>a</sup>       | 0.28 (0.008) <sup>b</sup>   | 0.59 (0.01) <sup>a</sup>    |
| <b>Saturated fatty acids</b>                             |                              |                              |                            |                               |                             |                             |
| C14: Myristic acid                                       | 2.990 (0.227) <sup>b</sup>   | 9.324 (0.439) <sup>a</sup>   | 3.092 (0.062) <sup>b</sup> | 4.162 (0.015) <sup>a</sup>    | 0.606 (0.014) <sup>b</sup>  | 0.761 (0.009) <sup>a</sup>  |
| C15:0 Pentadecylic acid                                  | 0.03584 (0.00) <sup>b</sup>  | 0.175 (0.009) <sup>a</sup>   | 0.034 (0.003) <sup>a</sup> | 0.043(0.0008) <sup>a</sup>    | 0.023 (0.001)               | 0.035 (0.008)               |
| C16:0 Palmitic acid                                      | 1.850 (0.015) <sup>b</sup>   | 7.481 (0.101) <sup>a</sup>   | 1.920 (0.025) <sup>b</sup> | 3.419 (0.024) <sup>a</sup>    | 0.593 (0.004) <sup>a</sup>  | 1.108 (0.003) <sup>b</sup>  |
| C18:0 Stearic acid                                       | 0.054 (0.002) <sup>b</sup>   | 0.381 (0.0) <sup>a</sup>     | 0.051 (0.002) <sup>b</sup> | 0.119 (0.0) <sup>a</sup>      | 0.054 (0.0009) <sup>b</sup> | 0.118 (0.001) <sup>a</sup>  |
| <b>Monounsaturated fatty acids</b>                       |                              |                              |                            |                               |                             |                             |
| C14:1 Myristoleic acid                                   | 0.026 (0.0)                  | 0.059 (0.003)                | 0.029 (0.001)              | 0.018 (0.0)                   | 0.007 (0.0)                 | 0.009 (0.0006)              |
| C16:1 Palmitoleic acid                                   | 0.542 (0.003) <sup>b</sup>   | 1.623 (0.003) <sup>a</sup>   | 0.571 (0.020) <sup>a</sup> | 0.547 (0.006) <sup>a</sup>    | 0.893 (0.001) <sup>a</sup>  | 0.675 (0.006) <sup>b</sup>  |
| C18:1n9c Oleic acid                                      | 1.591 (0.232) <sup>b</sup>   | 8.016 (0.204) <sup>a</sup>   | 1.694 (0.015) <sup>b</sup> | 4.214 (0.032) <sup>a</sup>    | 0.028 (0.0002) <sup>a</sup> | 0.015 (0.0005) <sup>b</sup> |
| <b>Polyunsaturated fatty acids</b>                       |                              |                              |                            |                               |                             |                             |
| C18:2n6c Linoleic acid                                   | 0.715 (0.033) <sup>b</sup>   | 0.926 (0.01) <sup>a</sup>    | 0.713 (0.003) <sup>a</sup> | 0.550 (0.006) <sup>b</sup>    | 0.025 (0.008) <sup>b</sup>  | 0.064 (0.006) <sup>a</sup>  |
| C18:3n3 Linolenic acid                                   | 1.302 (0.056) <sup>b</sup>   | 2.909 (0.06) <sup>a</sup>    | 0.986 (0.014) <sup>b</sup> | 1.180 (0.01) <sup>a</sup>     | NC                          | 0.009 (0.006)               |

|                                     |                           |                           |                           |                            |                            |                            |
|-------------------------------------|---------------------------|---------------------------|---------------------------|----------------------------|----------------------------|----------------------------|
| C18:3n6 G-linolenic acid            | 0.094 (0.003)             | NC                        | 0.21 (0.001) <sup>a</sup> | 0.038 (0.001) <sup>b</sup> | 0.014 (0.008)              | 0.019 (0.005)              |
| C20:4n6 Arachidonic acid (ARA)      | NC                        | NC                        | NC                        | NC                         | 0.068 (0.009)              | 0.008 (0.009)              |
| C20:5n3 Eicosapentaenoic acid (EPA) | 0.073 (0.006)             | 0.081 (0.003)             | 0.07 (0.005)              | 0.063 (0.0008)             | 0.161 (0.023) <sup>b</sup> | 0.363 (0.012) <sup>a</sup> |
| C22:6n3 Docosahexaenoic acid (DHA)  | 1.608 (0.02) <sup>b</sup> | 5.922 (0.04) <sup>a</sup> | 1.509 (0.06) <sup>b</sup> | 2.542 (0.04) <sup>a</sup>  | 0.014 (0.002)              | 0.050 (0.011)              |

ANOVAs followed by a Tukey test were used to compare statistical differences between NNM and WNM treatments for each microalga specie.

**Supplementary Table S2.** T test comparing proximal composition and fatty acid profile in each microalga used for dietary treatment and cultured with or without nutritional stress. Significant differences ( $P < 0.05$ ) are in bold.

|                                                   | <i>I. galbana</i> clon T-iso |       |                   | <i>P. lutheri</i> |       |               | <i>C. gracilis</i> |       |               |
|---------------------------------------------------|------------------------------|-------|-------------------|-------------------|-------|---------------|--------------------|-------|---------------|
| Factor                                            | t                            | DF    | P                 | t                 | DF    | P             | t                  | DF    | P             |
| Proteins<br>(ug. mg wet mass <sup>-1</sup> )      | 3.469                        | 3.575 | <b>0.03</b>       | 4.019             | 2.318 | <b>0.044</b>  |                    |       |               |
| Carbohydrates<br>(ug. mg wet mass <sup>-1</sup> ) | 3.938                        | 2.78  | <b>0.033</b>      | 5.074             | 3.121 | <b>0.013</b>  |                    |       |               |
| Lipids (% dry mass)                               |                              |       |                   |                   |       |               |                    |       |               |
| FAME (mg)                                         |                              |       |                   |                   |       |               |                    |       |               |
| Σ Saturated fatty acid                            | 31.76                        | 1.69  | <b>0.002</b>      | 32.22             | 1.021 | <b>0.018</b>  | 54.68              | 1.598 | <b>0.001</b>  |
| Σ Monounsaturated fatty acid                      | 29.3                         | 1.564 | <b>0.003</b>      | 62.35             | 1.01  | <b>0.009</b>  | 116.3              | 1.217 | <b>0.002</b>  |
| Σ Polyunsaturated fatty acid                      | 33.45                        | 2     | <b>0.0009</b>     | 8.984             | 1.489 | <b>0.028</b>  | 17.09              | 1.494 | <b>0.01</b>   |
| <b>Saturated fatty acids</b>                      |                              |       |                   |                   |       |               |                    |       |               |
| C14: Myristic acid                                | 12.81                        | 1.501 | <b>0.016</b>      | 16.62             | 1.123 | <b>0.027</b>  | 8.941              | 1.725 | <b>0.019</b>  |
| C15:0 Pentadecylic acid                           | 14.68                        | 1     | <b>0.043</b>      | 1                 | 1.855 | 0.429         | 6.063              | 1.125 | 0.085         |
| C16:0 Palmitic acid                               | 54.88                        | 1.04  | <b>0.009</b>      | 42.81             | 1.999 | <b>0.0005</b> | 84.3               | 1.79  | <b>0.0003</b> |
| C18:0 Stearic acid                                | 19.1                         | 1.028 | <b>0.03</b>       | 27.4              | 1     | <b>0.023</b>  | 35.78              | 1.742 | <b>0.001</b>  |
| <b>Monounsaturated fatty acids</b>                |                              |       |                   |                   |       |               |                    |       |               |
| C14:1 Myristoleic acid                            | 8                            | 1     | 0.079             | 5.5               | 1     | 0.114         | 3                  | 1     | 0.204         |
| C16:1 Palmitoleic acid                            | 203.3                        | 1.965 | <b>&lt;0.0001</b> | 0.552             | 1.16  | 0.668         | 33.07              | 1.047 | <b>0.016</b>  |
| C18:1n9c Oleic acid                               | 20.75                        | 1.968 | <b>0.025</b>      | 69.11             | 1.42  | <b>0.001</b>  | 18.38              | 2     | <b>0.002</b>  |
| <b>Polyunsaturated fatty acids</b>                |                              |       |                   |                   |       |               |                    |       |               |
| C18:2n6c Linoleic acid                            | 5.591                        | 2.000 | <b>0.030</b>      | 20.220            | 1.590 | <b>0.006</b>  | 18.380             | 2.000 | <b>0.002</b>  |
| C18:3n3 Linolenic acid                            | 19.490                       | 1.988 | <b>0.002</b>      | 10.630            | 1.865 | 0.110         | 4.500              | 1.000 | 0.139         |

|                                     |        |       |              |        |       |              |        |       |               |
|-------------------------------------|--------|-------|--------------|--------|-------|--------------|--------|-------|---------------|
| C18:3n6 G-linolenic acid            | 23.750 | 1.000 | <b>0.026</b> | 68.600 | 1.855 | <b>0.000</b> | 2.357  | 2.000 | 0.142         |
| C20:4n6 Arachidonic acid (ARA)      |        |       |              |        |       |              | 2.343  | 1.908 | 0.149         |
| C20:5n3 Eicosapentaenoic acid (EPA) | 0.868  | 1.590 | 0.496        | 1.268  | 1.017 | 0.422        | 38.100 | 1.965 | <b>0.0008</b> |
| C22:6n3 Docosahexaenoic acid (DHA)  | 81.640 | 1.702 | <b>0.001</b> | 12.990 | 1.877 | <b>0.007</b> | 12.330 | 1.000 | 0.051         |

T-tests were used to compare statistical differences between NNM and WNM treatments for each microalga specie.

**Supplementary Table S3.** Nucleotide sequences of primers for RT-qPCR used in this study.

| Gene              | GenBank number | Primer sequence (5'-3')                                | Reference                  |
|-------------------|----------------|--------------------------------------------------------|----------------------------|
| <i>ApTLR</i>      | MH732641       | F CGACAAAACAGAGAAACAAATGGC<br>R GTGAACCTCAGTCCGTCAATCT | Brokordt et al., 2019 [22] |
| <i>ApIkB</i>      | FJ824733       | F GCGTTGATGGTGTATGGTAC<br>R TCTGCCGTAATTCGTCTGTG       | Oyanedel et al., 2016 [77] |
| <i>ApBD1</i>      | KU499992       | F CTCGTCCCTCCCTAGTAAGATG<br>R GCACTTGTAACCTCCACAAACG   | González et al., 2017 [91] |
| <i>ApLBP/BPI1</i> | MN295978       | F CTGCTGCCAACCGTTCTGC<br>R CGCATGTGCAGATCAACCTGG       | González et al., 2020 [74] |
| <i>ApGLys</i>     | AY788903       | F GGAGACCATCACCATGCTTACG<br>R GGGAAATATGTGCGCAGCTGTC   | González et al., 2022 [92] |
| <i>Apβactin</i>   | FE895980.1     | F GAATCTGGCCCATCCATTGT<br>R CGTTCTCGTGGATTTTTTCAAGT    | Coba et al., 2016 [59]     |

**Supplementary Table S4.** Two-way ANOVA (A) and robust two-way ANOVA (B) evaluating the effect of ontogenic stage and dietary treatment on DPH and TMADPH (A) and Laurdan PG (B) in larvae and early juveniles of the scallop *A. purpuratus*. Significant differences ( $P < 0.05$ ) are in bold.

| Two-way ANOVA (A)        |            |         |           |                       |        |                                         |
|--------------------------|------------|---------|-----------|-----------------------|--------|-----------------------------------------|
| Parameter                | Source     | DF      | SS        | MS                    | F      | P                                       |
| DPH                      | Stage      | 2       | 0.0007159 | 0.0003579             | 37.799 | <b><math>4.18 \times 10^{-5}</math></b> |
|                          | Diet       | 1       | 0.0006717 | 0.0006717             | 70.936 | <b><math>1.46 \times 10^{-5}</math></b> |
|                          | Stage×Diet | 2       | 0.0000191 | 0.0000095             | 1.008  | 0.403                                   |
|                          | Residual   | 9       | 0.0000852 | 0.0000095             |        |                                         |
| TMADPH                   | Stage      | 2       | 0.00001   | $8.97 \times 10^{-6}$ | 0.079  | 0.924                                   |
|                          | Diet       | 1       | 0.00001   | $1.33 \times 10^{-5}$ | 0.117  | 0.738                                   |
|                          | Stage×Diet | 2       | 0.00005   | $2.57 \times 10^{-5}$ | 0.227  | 0.801                                   |
|                          | Residual   | 11      | 0.00121   | $1.13 \times 10^{-4}$ |        |                                         |
| ROBUST two-way ANOVA (B) |            |         |           |                       |        |                                         |
| Parameter                | Source     | Value   |           | P                     |        |                                         |
| Laurdan PG               | Stage      | 12.1823 |           | <b>0.038</b>          |        |                                         |
|                          | Diet       | 11.3590 |           | <b>0.009</b>          |        |                                         |
|                          | Stage×Diet | 29.9682 |           | <b>0.003</b>          |        |                                         |

**Supplementary Table S5.** Two-way ANOVA evaluating the effect of ontogenic stage and dietary treatment on the PK, CS, and ETS activities and the PK:CS and ETS:CS ratios in larvae and early juveniles of the scallop *A. purpuratus*. Significant differences ( $P < 0.05$ ) are in bold.

| Factor | Source     | DF | SS   | MS     | F      | P                            |
|--------|------------|----|------|--------|--------|------------------------------|
| PK     | Stage      | 2  | 12.7 | 6.355  | 37.991 | <b>2.64×10<sup>-8</sup></b>  |
|        | Diet       | 1  | 1.38 | 1.382  | 8.261  | <b>0.00815</b>               |
|        | Stage×Diet | 2  | 1.36 | 0.681  | 4.073  | <b>0.02943</b>               |
|        | Residual   | 25 | 4.18 | 0.167  |        |                              |
| CS     | Stage      | 2  | 6608 | 3304   | 58.035 | <b>4.04×10<sup>-10</sup></b> |
|        | Diet       | 1  | 175  | 175    | 3.08   | 0.0915                       |
|        | Stage×Diet | 2  | 43   | 22     | 0.382  | 0.6866                       |
|        | Residual   | 25 | 1423 | 57     |        |                              |
| ETS    | Stage      | 2  | 12.7 | 6.362  | 32.943 | <b>5.70×10<sup>-8</sup></b>  |
|        | Diet       | 1  | 0.47 | 0.465  | 2.409  | 0.1322                       |
|        | Stage×Diet | 2  | 4.06 | 2.031  | 10.515 | <b>0.0004</b>                |
|        | Residual   | 27 | 5.22 | 0.193  |        |                              |
| PK:CS  | Stage      | 2  | 0.42 | 0.2094 | 14.65  | <b>6.15×10<sup>-5</sup></b>  |
|        | Diet       | 1  | 0.08 | 0.0818 | 5.725  | <b>0.0246</b>                |
|        | Stage×Diet | 2  | 0.06 | 0.0312 | 2.184  | 0.1336                       |
|        | Residual   | 25 | 0.36 | 0.0142 |        |                              |
| ETS:CS | Stage      | 2  | 0.01 | 0.0026 | 1.992  | 0.1567                       |
|        | Diet       | 1  | 0    | 0.0036 | 2.672  | 0.1141                       |
|        | Stage×Diet | 2  | 0.03 | 0.0129 | 9.61   | <b>0.0007</b>                |
|        | Residual   | 26 | 0.04 | 0.0013 |        |                              |



**Supplementary Table S6.** Two-way ANOVA evaluating the effect of the bacterial challenge with *V. splendidus* VPAP18 and the dietary treatment on the PK, CS and ETS enzyme activities and the PK:CS and ETS:CS ratios in larvae and early juveniles of the scallop *A. purpuratus*. Significant differences ( $P < 0.05$ ) are in bold.

| Parameter | Stage       | Source         | DF | SS     | MS     | F     | P                          |
|-----------|-------------|----------------|----|--------|--------|-------|----------------------------|
| PK        | Veliger     | Challenge      | 1  | 51.47  | 51.47  | 2.848 | 0.11                       |
|           |             | Diet           | 1  | 18.94  | 18.94  | 1.048 | 0.32                       |
|           |             | Challenge×Diet | 1  | 4.64   | 4.64   | 0.257 | 0.619                      |
|           |             | Residual       | 17 | 307.23 | 18.07  |       |                            |
|           | Pediveliger | Challenge      | 1  | 4.93   | 4.93   | 0.407 | 0.535                      |
|           |             | Diet           | 1  | 46.78  | 46.78  | 3.868 | 0.072                      |
|           |             | Challenge×Diet | 1  | 18.23  | 18.23  | 1.507 | 0.243                      |
|           |             | Residual       | 12 | 145.12 | 12.09  |       |                            |
|           | Juvenile    | Challenge      | 1  | 12.27  | 12.27  | 2.769 | 0.112                      |
|           |             | Diet           | 1  | 11.77  | 11.766 | 2.655 | 0.119                      |
|           |             | Challenge×Diet | 1  | 21.9   | 21.902 | 4.943 | <b>0.038</b>               |
|           |             | Residual       | 19 | 84.19  | 4.431  |       |                            |
|           | CS          | Challenge      | 1  | 0.09   | 0.087  | 0.161 | 0.69                       |
|           |             | Diet           | 1  | 1.07   | 1.065  | 1.974 | 0.165                      |
|           |             | Challenge×Diet | 1  | 0.24   | 0.239  | 0.444 | 0.508                      |
|           |             | Residual       | 60 | 32.39  | 0.539  |       |                            |
|           | Pediveliger | Challenge      | 1  | 1.707  | 1.707  | 6.345 | <b>0.024</b>               |
|           |             | Diet           | 1  | 1.398  | 1.397  | 5.194 | <b>0.038</b>               |
|           |             | Challenge×Diet | 1  | 1.78   | 1.779  | 6.614 | <b>0.022</b>               |
|           |             | Residual       | 14 | 3.767  | 0.269  |       |                            |
|           | Juvenil     | Challenge      | 1  | 0.033  | 0.032  | 0.175 | 0.68                       |
|           |             | Diet           | 1  | 0.091  | 0.091  | 0.492 | 0.491                      |
|           |             | Challenge×Diet | 1  | 0      | 0.0004 | 0.002 | 0.964                      |
|           |             | Residual       | 20 | 3.713  | 0.185  |       |                            |
| ETS       | Veliger     | Challenge      | 1  | 0.011  | 0.011  | 0.365 | 0.553                      |
|           |             | Diet           | 1  | 0.111  | 0.111  | 3.628 | 0.072                      |
|           |             | Challenge×Diet | 1  | 0.028  | 0.028  | 0.928 | 0.348                      |
|           |             | Residual       | 18 | 0.551  | 0.030  |       |                            |
|           | Pediveliger | Challenge      | 1  | 0.306  | 0.306  | 8.476 | <b>0.010</b>               |
|           |             | Diet           | 1  | 0.961  | 0.961  | 26.6  | <b>9.5×10<sup>-5</sup></b> |
|           |             |                |    |        |        |       |                            |
|           |             |                |    |        |        |       |                            |

|        |             |                |    |         |          |       |               |
|--------|-------------|----------------|----|---------|----------|-------|---------------|
| PK:CS  |             | Challenge×Diet | 1  | 0.007   | 0.007    | 0.202 | 0.659         |
|        |             | Residual       | 16 | 0.578   | 0.036    |       |               |
|        | Juvenile    | Challenge      | 1  | 0.005   | 0.005    | 0.247 | 0.624         |
|        |             | Diet           | 1  | 0.139   | 0.139    | 6.327 | <b>0.020</b>  |
|        |             | Challenge×Diet | 1  | 0.038   | 0.038    | 1.733 | 0.202         |
|        |             | Residual       | 20 | 0.440   | 0.022    |       |               |
|        | Veliger     | Challenge      | 1  | 0       | 0.000005 | 0     | 0.984         |
|        |             | Diet           | 1  | 0.00515 | 0.005147 | 0.439 | 0.516         |
|        |             | Challenge×Diet | 1  | 0.01003 | 0.010034 | 0.857 | 0.368         |
|        |             | Residual       | 17 | 0.19912 | 0.011713 |       |               |
|        | Pediveliger | Challenge      | 1  | 0.032   | 0.032    | 3.55  | 0.086         |
|        |             | Diet           | 1  | 0.106   | 0.106    | 11.5  | <b>0.006</b>  |
|        |             | Challenge×Diet | 1  | 0.012   | 0.012    | 1.308 | 0.277         |
|        |             | Residual       | 11 | 0.101   | 0.009    |       |               |
|        | Juvenile    | Challenge      | 1  | 0.079   | 0.079    | 0.372 | 0.549         |
|        |             | Diet           | 1  | 0.115   | 0.114    | 0.537 | 0.473         |
|        |             | Challenge×Diet | 1  | 0.456   | 0.455    | 2.135 | 0.16          |
|        |             | Residual       | 19 | 4.056   | 0.213    |       |               |
| ETS:CS | Veliger     | Challenge      | 1  | 0.004   | 0.004    | 0.066 | 0.800         |
|        |             | Diet           | 1  | 0.0004  | 0.0004   | 0.005 | 0.944         |
|        |             | Challenge×Diet | 1  | 0.863   | 0.863    | 12.55 | <b>0.002</b>  |
|        |             | Residual       | 16 | 1.101   | 0.068    |       |               |
|        | Pediveliger | Challenge      | 1  | 1.802   | 1.802    | 15.73 | <b>0.001</b>  |
|        |             | Diet           | 1  | 3.269   | 3.269    | 28.52 | <b>0.0001</b> |
|        |             | Challenge×Diet | 1  | 0.052   | 0.052    | 0.457 | 0.509         |
|        |             | Residual       | 14 | 1.604   | 0.115    |       |               |
|        | Juvenile    | Challenge      | 1  | 0.015   | 0.015    | 0.032 | 0.860         |
|        |             | Diet           | 1  | 2.468   | 2.467    | 5.214 | <b>0.033</b>  |
|        |             | Challenge×Diet | 1  | 0.597   | 0.596    | 1.261 | 0.274         |
|        |             | Residual       | 20 | 9.466   | 0.473    |       |               |

---

**Supplementary Table S7.** Two-way ANOVA evaluating the effect of diet and bacterial challenge on the respiration rate (nmol O<sub>2</sub>·h<sup>-1</sup>·ind<sup>-1</sup>) in veliger larvae of the scallop *A. purpuratus*.

| Source           | DF | SS        | MS       | F     | P                 |
|------------------|----|-----------|----------|-------|-------------------|
| Diet             | 1  | 0.0005265 | 0.000526 | 54,84 | <b>&lt;0,0001</b> |
| Challenge        | 1  | 0.008203  | 0.008203 | 854,5 | <b>&lt;0,0001</b> |
| Diet × Challenge | 1  | 0.0005265 | 0.000526 | 54,84 | <b>&lt;0,0001</b> |
| Residual         | 20 | 0.000192  | 0.000009 |       |                   |

**Supplementary Table S8.** Two-way ANOVA evaluating the effect of ontogenic stage on the basal relative mRNA expression of *ApTLR*, *ApIkB*, *ApBD1*, *ApLBP/BPI* and *ApGLys* in larvae and early juveniles of the scallop *A. purpuratus*. Significant differences (P< 0.05) are in bold.

| Gene             | Source     | DF | SS     | MS      | F       | P               |
|------------------|------------|----|--------|---------|---------|-----------------|
| <i>ApTLR</i>     | Stage      | 2  | 9,769  | 4,884   | 50,798  | <b>3,96E-08</b> |
|                  | Diet       | 1  | 2,501  | 2,501   | 26,01   | <b>7,48E-05</b> |
|                  | Stage×Diet | 2  | 0,049  | 0,024   | 0,255   | 0,778           |
|                  | Residual   | 18 | 1,731  | 0,096   |         |                 |
| <i>ApIkB</i>     | Stage      | 2  | 7.147  | 3.573   | 89.31   | <b>2.18E-10</b> |
|                  | Diet       | 1  | 2.865  | 2.865   | 71.59   | <b>7.22E-08</b> |
|                  | Stage×Diet | 2  | 1.478  | 0.739   | 18.48   | <b>3.50E-05</b> |
|                  | Residual   | 19 | 0.76   | 0.04    |         |                 |
| <i>ApBD1</i>     | Stage      | 2  | 21.655 | 10.827  | 138.356 | <b>8.10E-13</b> |
|                  | Diet       | 1  | 0.609  | 0.609   | 7.778   | <b>0.011</b>    |
|                  | Stage×Diet | 2  | 1.649  | 0.824   | 10.534  | <b>0.000679</b> |
|                  | Residual   | 21 | 1.643  | 0.078   |         |                 |
| <i>ApLBP/BPI</i> | Stage      | 2  | 0.4739 | 0.23694 | 27.348  | <b>1.08E-06</b> |
|                  | Diet       | 1  | 0.0009 | 0.00094 | 0.109   | 0.745           |
|                  | Stage×Diet | 2  | 0.0082 | 0.00409 | 0.472   | 0.63            |
|                  | Residual   | 22 | 0.1906 | 0.00866 |         |                 |
| <i>ApGLys</i>    | Stage      | 2  | 2.6679 | 1.334   | 13.436  | <b>0.000154</b> |
|                  | Diet       | 1  | 0.6401 | 0.6401  | 6.447   | <b>0.018693</b> |
|                  | Stage×Diet | 2  | 0.1127 | 0.0564  | 0.568   | 0.574901        |
|                  | Residual   | 22 | 2.1842 | 0.0993  |         |                 |

**Supplementary Table S9.** Two-way ANOVA evaluating the effect of dietary treatment and bacterial exposure to *V. splendidus* VPAP18 on the relative expression of immune-related genes (*ApTLR*, *ApIkB*, *ApBD1*, *ApLBP/BPI1* and *ApGLys*) in larvae and early juveniles of the scallop *A. purpuratus*. Significant differences ( $P < 0.05$ ) are in bold. The analysis type depended on the distribution of raw data.

| Gene         | Stage          | Source           | DF | SS      | MS      | F       | P               |
|--------------|----------------|------------------|----|---------|---------|---------|-----------------|
| <i>ApTLR</i> | Veliger        | Diet             | 1  | 0,101   | 0,1009  | 0,302   | 0.589           |
|              |                | Challenge        | 1  | 0,857   | 0,8566  | 2,566   | 0.127           |
|              |                | Diet × Challenge | 1  | 1,733   | 1,7326  | 5,191   | <b>0.036</b>    |
|              |                | Residual         | 17 | 5,674   | 0,3338  |         |                 |
|              | Pediveliger    | Diet             | 1  | 0.5758  | 0.5758  | 34.714  | <b>7.34E-05</b> |
|              |                | Challenge        | 1  | 0.3438  | 0.3438  | 20.727  | <b>0.000663</b> |
|              |                | Diet × Challenge | 1  | 0.054   | 0.054   | 3.253   | 0.09642         |
|              |                | Residual         | 12 | 0.199   | 0.0166  |         |                 |
|              | Early juvenile | Diet             | 1  | 0.7897  | 0.7897  | 11.501  | <b>0.0116</b>   |
|              |                | Challenge        | 1  | 0.0692  | 0.0692  | 1.007   | 0.349           |
|              |                | Diet × Challenge | 1  | 0.0046  | 0.0046  | 0.067   | 0.8035          |
|              |                | Residual         | 7  | 0.4806  | 0.0687  |         |                 |
| <i>ApIkB</i> | Veliger        | Diet             | 1  | 9.039   | 9.039   | 140.388 | <b>6.19E-10</b> |
|              |                | Challenge        | 1  | 0.099   | 0.099   | 1.544   | 0.23            |
|              |                | Diet × Challenge | 1  | 0.046   | 0.046   | 0.716   | 0.408           |
|              |                | Residual         | 18 | 1.159   | 0.064   |         |                 |
|              | Pediveliger    | Diet             | 1  | 0.0247  | 0.0247  | 0.288   | 0.60207         |
|              |                | Challenge        | 1  | 0.115   | 0.115   | 1.343   | 0.27101         |
|              |                | Diet × Challenge | 1  | 0.8994  | 0.8994  | 10.509  | <b>0.00785</b>  |
|              |                | Residual         | 11 | 0.9414  | 0.0856  |         |                 |
|              | Early juvenile | Diet             | 1  | 0.01626 | 0.01626 | 3.232   | 0.1153          |
|              |                | Challenge        | 1  | 0.03317 | 0.03317 | 6.594   | <b>0.0371</b>   |
|              |                | Diet × Challenge | 1  | 0.00914 | 0.00914 | 1.817   | 0.2196          |
|              |                | Residual         | 7  | 0.03521 | 0.00503 |         |                 |
| <i>ApBD1</i> | Veliger        | Diet             | 1  | 0.3057  | 0.30566 | 2.13    | 0.16            |
|              |                | Challenge        | 1  | 0.0389  | 0.03891 | 0.271   | 0.608           |
|              |                | Diet × Challenge | 1  | 0.1367  | 0.1367  | 0.953   | 0.341           |
|              |                | Residual         | 20 | 2.8697  | 0.14349 |         |                 |
|              | Pediveliger    | Diet             | 1  | 1.4134  | 1.4134  | 22.326  | <b>0.000493</b> |
|              |                | Challenge        | 1  | 2.9165  | 2.9165  | 46.07   | <b>1.94E-05</b> |
|              |                | Diet × Challenge | 1  | 0.0445  | 0.0445  | 0.703   | 0.41824         |
|              |                | Residual         | 12 | 0.7597  | 0.0633  |         |                 |

|                   |                |                  |    |         |          |        |                |
|-------------------|----------------|------------------|----|---------|----------|--------|----------------|
| <i>ApLBP/BPI1</i> | Juvenil        | Diet             | 1  | 2.7398  | 2.7398   | 23.744 | <b>0.00181</b> |
|                   |                | Challenge        | 1  | 0.6275  | 0.6275   | 5.438  | 0.05246        |
|                   |                | Diet × Challenge | 1  | 0.03    | 0.03     | 0.26   | 0.62587        |
|                   |                | Residual         | 7  | 0.8077  | 0.1154   |        |                |
|                   | Veliger        | Diet             | 1  | 0.0734  | 0.07336  | 0.75   | 0.397          |
|                   |                | Challenge        | 1  | 0.0215  | 0.02146  | 0.219  | 0.645          |
|                   |                | Diet × Challenge | 1  | 0.0106  | 0.01059  | 0.108  | 0.746          |
|                   |                | Residual         | 20 | 1.957   | 0.09785  |        |                |
|                   | Pediveliger    | Diet             | 1  | 0.03437 | 0.03437  | 17.217 | <b>0.001</b>   |
|                   |                | Challenge        | 1  | 0.04681 | 0.04681  | 23.454 | <b>0.0003</b>  |
|                   |                | Diet × Challenge | 1  | 0.00674 | 0.00674  | 3.376  | 0.087          |
|                   |                | Residual         | 14 | 0.02794 | 0.002    |        |                |
|                   | Early juvenile | Diet             | 1  | 0.00142 | 0.00142  | 0.155  | 0.706          |
|                   |                | Challenge        | 1  | 0.00188 | 0.001879 | 0.205  | 0.665          |
|                   |                | Diet × Challenge | 1  | 0.00054 | 0.00054  | 0.059  | 0.815          |
|                   |                | Residual         | 7  | 0.06424 | 0.009177 |        |                |
| <i>ApGLys</i>     | Veliger        | Diet             | 1  | 0.0138  | 0.01377  | 0.123  | 0.729          |
|                   |                | Challenge        | 1  | 0.002   | 0.00202  | 0.018  | 0.894          |
|                   |                | Diet × Challenge | 1  | 0.4310  | 0.4310   | 4.969  | <b>0.032</b>   |
|                   |                | Residual         | 20 | 2.2337  | 0.11169  |        |                |
|                   | Pediveliger    | Diet             | 1  | 0.02691 | 0.02691  | 2.887  | 0.111          |
|                   |                | Challenge        | 1  | 0.01741 | 0.01741  | 1.868  | 0.193          |
|                   |                | Diet × Challenge | 1  | 0.03324 | 0.03324  | 3.565  | 0.074          |
|                   |                | Residual         | 14 | 0.13051 | 0.00932  |        |                |
|                   | Early juvenile | Diet             | 1  | 0.3783  | 0.3783   | 35.848 | <b>0.0005</b>  |
|                   |                | Challenge        | 1  | 0.0022  | 0.0022   | 0.209  | 0.661          |
|                   |                | Diet × Challenge | 1  | 0.0016  | 0.0016   | 0.148  | 0.712          |
|                   |                | Residual         | 7  | 0.0739  | 0.0106   |        |                |

---

**Supplementary Table S10.** Two-way ANOVA evaluating the effect of dietary treatment and bacterial exposure to *V. splendidus* VPAP18 on total *Vibrio* growth in veliger larvae of the scallop *A. purpuratus*. Significant differences ( $P < 0.05$ ) are in bold.

| Source           | DF | SS    | MS    | F      | P              |
|------------------|----|-------|-------|--------|----------------|
| Diet             | 1  | 10667 | 10667 | 18.284 | <b>0.00523</b> |
| Challenge        | 1  | 8561  | 8561  | 14.675 | <b>0.00865</b> |
| Diet × Challenge | 1  | 1620  | 1620  | 2.777  | 0.14665        |
| Residual         | 6  | 3500  | 583   |        |                |

**Supplementary Table S11.** Two-way ANOVA evaluating the effect of farming time and dietary treatment on *A. purpuratus* larval growth/length and survival. Significant differences ( $P < 0.05$ ) are in bold.

| Parameter               | Source       | DF  | SS      | MS      | F     | P                 |
|-------------------------|--------------|-----|---------|---------|-------|-------------------|
| Growth/<br>First spawn  | Farming time | 5   | 5201667 | 1040333 | 10403 | <b>&lt;0.0001</b> |
|                         | Diet         | 1   | 133333  | 133333  | 1333  | <b>&lt;0.0001</b> |
|                         | Time × Diet  | 5   | 174667  | 34933   | 349   | <b>&lt;0.0001</b> |
|                         | Residual     | 108 | 10800   | 100     |       |                   |
| Growth/<br>Second spawn | Farming time | 4   | 133276  | 33319   | 433   | <b>&lt;0.0001</b> |
|                         | Diet         | 1   | 3900    | 3900    | 50.75 | <b>&lt;0.0001</b> |
|                         | Time × Diet  | 4   | 1594    | 398     | 5.186 | <b>0.0005</b>     |
|                         | Residual     | 230 | 17675   | 76.85   |       |                   |
| Survival                | Farming time | 5   | 70627   | 14125   | 2724  | <b>&lt;0.0001</b> |
|                         | Diet         | 1   | 7695    | 7695    | 1484  | <b>&lt;0.0001</b> |
|                         | Time × Diet  | 5   | 2250    | 450     | 86.78 | <b>&lt;0.0001</b> |
|                         | Residual     | 250 | 1296    | 5.185   |       |                   |
